# Supplementary material for: Informing the pandemic response: the role of the WHO’s COVID-19 Weekly Epidemiological Update
Source: PubMed Central journal article supplement (PMC11002403; doi:10.1136/bmjgh-2023-014466), 2024-04-04
Supplement: bmjgh-2023-014466supp001.pdf [file bmjgh-2023-014466supp001.pdf]

**Appendix 1. COVID-19 WEU Special Focus: Topics covered and dates of publication.**

| <b>Date of publication</b> | <b>Special Focus</b>                                                                                                                                                                                                        |
|----------------------------|-----------------------------------------------------------------------------------------------------------------------------------------------------------------------------------------------------------------------------|
| 19 January 2021            | Children, COVID-19, and transmission in schools                                                                                                                                                                             |
| 27 January 2021            | Solidarity II forum and use of international standards for seroepidemiology surveys                                                                                                                                         |
| 2 February 2021            | COVID-19 and health workers                                                                                                                                                                                                 |
| 9 February 2021            | How COVAX is distributing the first COVID-19 vaccines to prioritized countries in all six WHO regions                                                                                                                       |
| 16 February 2021           | The global influenza surveillance and response system                                                                                                                                                                       |
| 23 February 2021           | WHO COVID-19 vaccine policy recommendations                                                                                                                                                                                 |
| 2 March 2021               | 1. COVID-19 trade, travel and points of entry<br>2. The importance of fit, filtration and breathability of non-medical (fabric) masks in the context of COVID-19                                                            |
| 9 March 2021               | 1. Global Influenza Surveillance and Response System – best practices for integrating influenza and COVID-19 sentinel surveillance<br>2. SARS-CoV-2 sero-epidemiology in Kenya                                              |
| 16 March 2021              | Building and maintaining trust - what countries should do to prepare communities for a COVID-19 vaccine, treatment, or a new test; and                                                                                      |
| 23 March 2021              | Release of WHO COVID-19 Detailed Surveillance Dashboard                                                                                                                                                                     |
| 30 March 2021              | COVID-19 and Health and Care Workers (HCWs)                                                                                                                                                                                 |
| 20 April 2021              | 1. WHO COVID-19 global rapid risk assessment<br>2. Pandemic influenza surveillance—drawing a parallel with the COVID-19 pandemic                                                                                            |
| 4 May 2021                 | 1. World Hand Hygiene Day, 5 May 2021<br>2. WHO partnership with SeroTracker — synthesizing “real-time” seroprevalence data to support global pandemic response                                                             |
| 1 June 2021                | Lessons learned during the early phases of rolling out COVID-19 vaccines, with a particular focus on low-and-middle income countries (LMICs).                                                                               |
| 15 June 2021               | Update about strengthening public health intelligence through event-based surveillance, specifically learning from the COVID-19 pandemic.                                                                                   |
| 22 June 2021               | Global Consultation on SARS-CoV-2 Variants of Concern and their Impact on Public Health Interventions.                                                                                                                      |
| 29 June 2021               | Overview of current challenges in the context of the COVID-19 pandemic, as well as a summary of WHO global conference on communicating science during health emergencies.                                                   |
| 6 July 2021                | Variant working definitions, as well as other variants and amino acid changes under monitoring                                                                                                                              |
| 13 July 2021               | A synopsis of the latest WHO COVID-19 Rapid Risk Assessment, which aims to review the current status of global public health risks associated with the pandemic through an in-depth hazard, exposure and context assessment |
| 20 July 2021               | The release of a WHO COVID-19 detailed surveillance data dashboard, including a downloadable database feature                                                                                                               |
| 27 July 2021               | The evaluation of COVID-19 vaccines and their effectiveness in real world settings.                                                                                                                                         |
| 17 August 2021             | COVID-19 in Prisons                                                                                                                                                                                                         |
| 14 September 2021          | COVID-19 in children and adolescents                                                                                                                                                                                        |

---

|                   |                                                                                                                                       |
|-------------------|---------------------------------------------------------------------------------------------------------------------------------------|
| 28 September 2021 | Approaches to determining waning COVID-19 vaccine effectiveness                                                                       |
| 26 October 2021   | 1.WHO COVID-19 global rapid risk assessment<br>2.Age and sex distribution from WHO COVID-19 global surveillance                       |
| 23 November 2021  | Points of entry, international travel and transport in the context of the COVID-19 pandemic                                           |
| 18 January 2022   | WHO COVID-19 global rapid risk assessment                                                                                             |
| 15 March 2022     | Contact tracing and quarantine in the context of the Omicron SARS-CoV-2 variant: interim guidance                                     |
| 12 April 2022     | Update on WHO COVID-19 global rapid risk assessment                                                                                   |
| 20 April 2022     | Applying Geographic Information Systems to the COVID-19 response                                                                      |
| 18 May 2022       | Environmental surveillance for SARS-CoV-2 to complement public health surveillance                                                    |
| 15 June 2022      | Mass gathering events during disease outbreaks and WHO's recommended risk-based approach to decision-making for mass gathering events |
| 29 June 2022      | Relative vaccine effectiveness                                                                                                        |
| 13 July 2022      | WHO global situational alert system                                                                                                   |
| 16 March 2023     | COVID-19 vaccination status of health and care workers                                                                                |
| 13 April 2023     | Updated Interim Guidance on Adjusting Public Health and Social Measures for COVID-19                                                  |

---
